# Supplementary material
Source: publisher figshare collection journal article supplement (https://wiley.figshare.com/articles/dataset/_/3518375)
Supplement: Supplementary file 2 [file 1 › appendix-A.htm]

Ecological Archives A023-031-A1


*Ecological Archives* A023-031-A1

Jeff A. Tracey, Jun Zhu, Erin Boydston, Lisa Lyren, Robert N. Fisher, Kevin R. Crooks. 2013. Mapping behavioral landscapes for animal movement: a finite mixture modeling approach. *Ecological Applications* 23:654–669. http://dx.doi.org/10.1890/12-0687.1

Appendix A. Formulations for extensions of the models that include movement distance.

View / Download PDF


---

[Back to A023-031]
